# Supplementary material for: Deconvolution of bulk blood eQTL effects into immune cell subpopulations
Source: PubMed Central journal article supplement (PMC7291428; doi:10.1186/s12859-020-03576-5), 2020-06-12

# Supp. Figure 1.

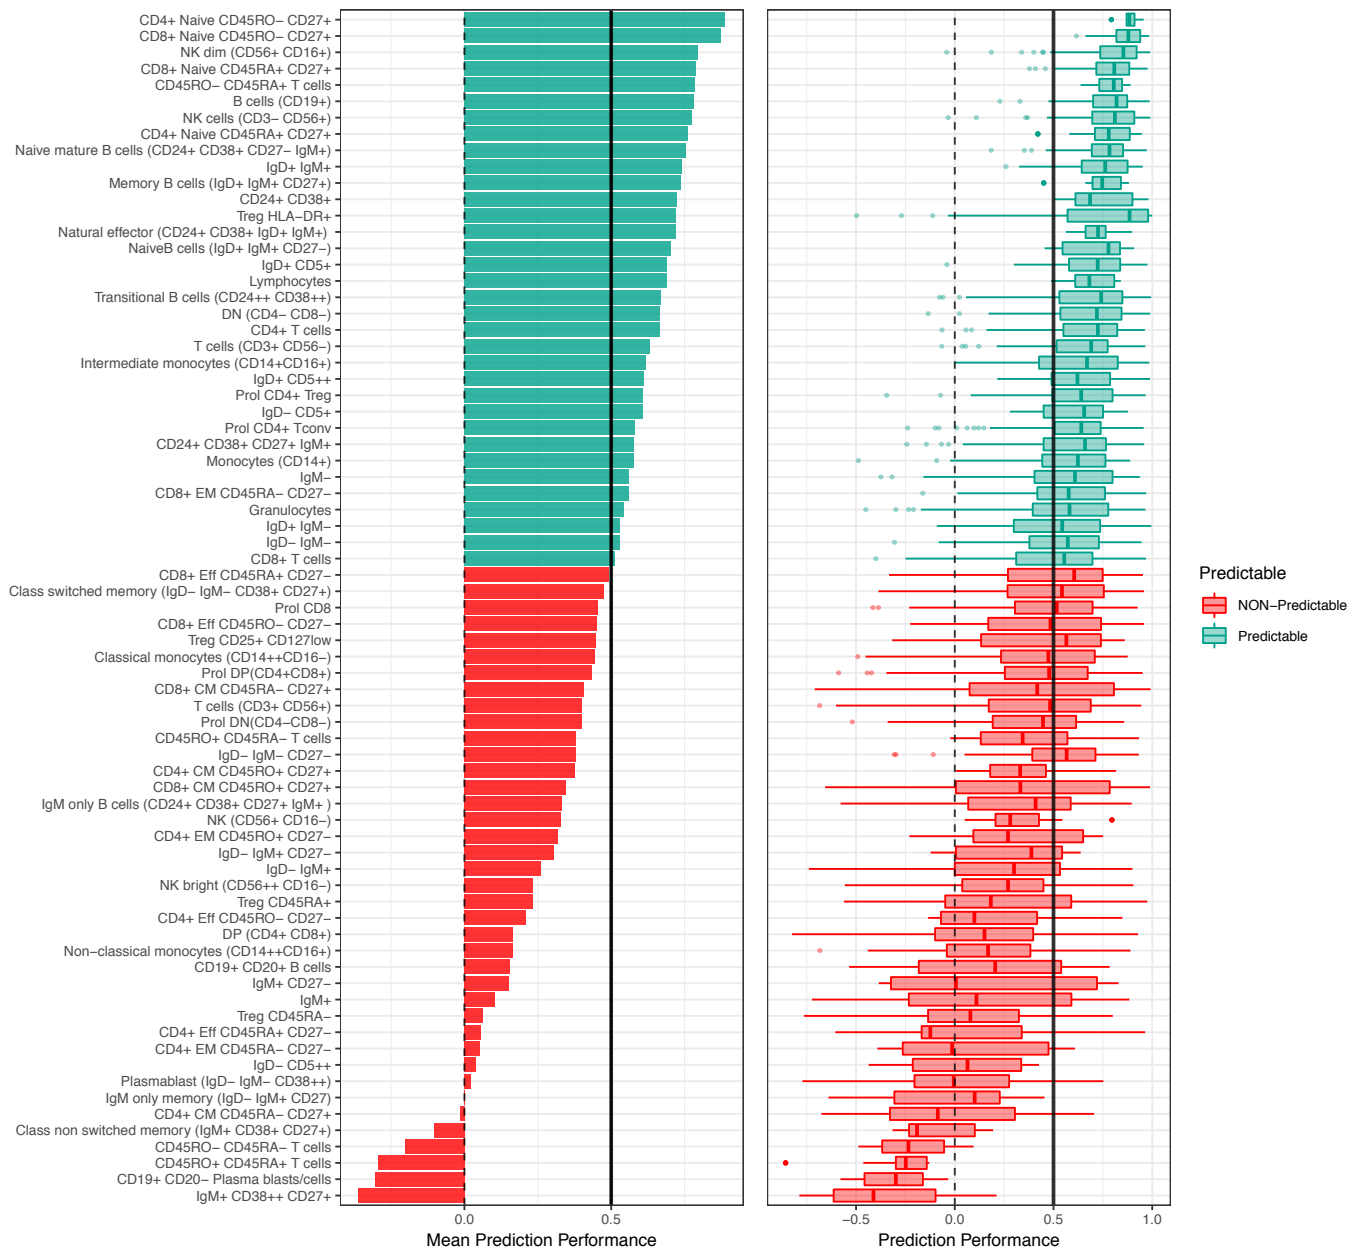

# Supp. Figure 2.

**A**

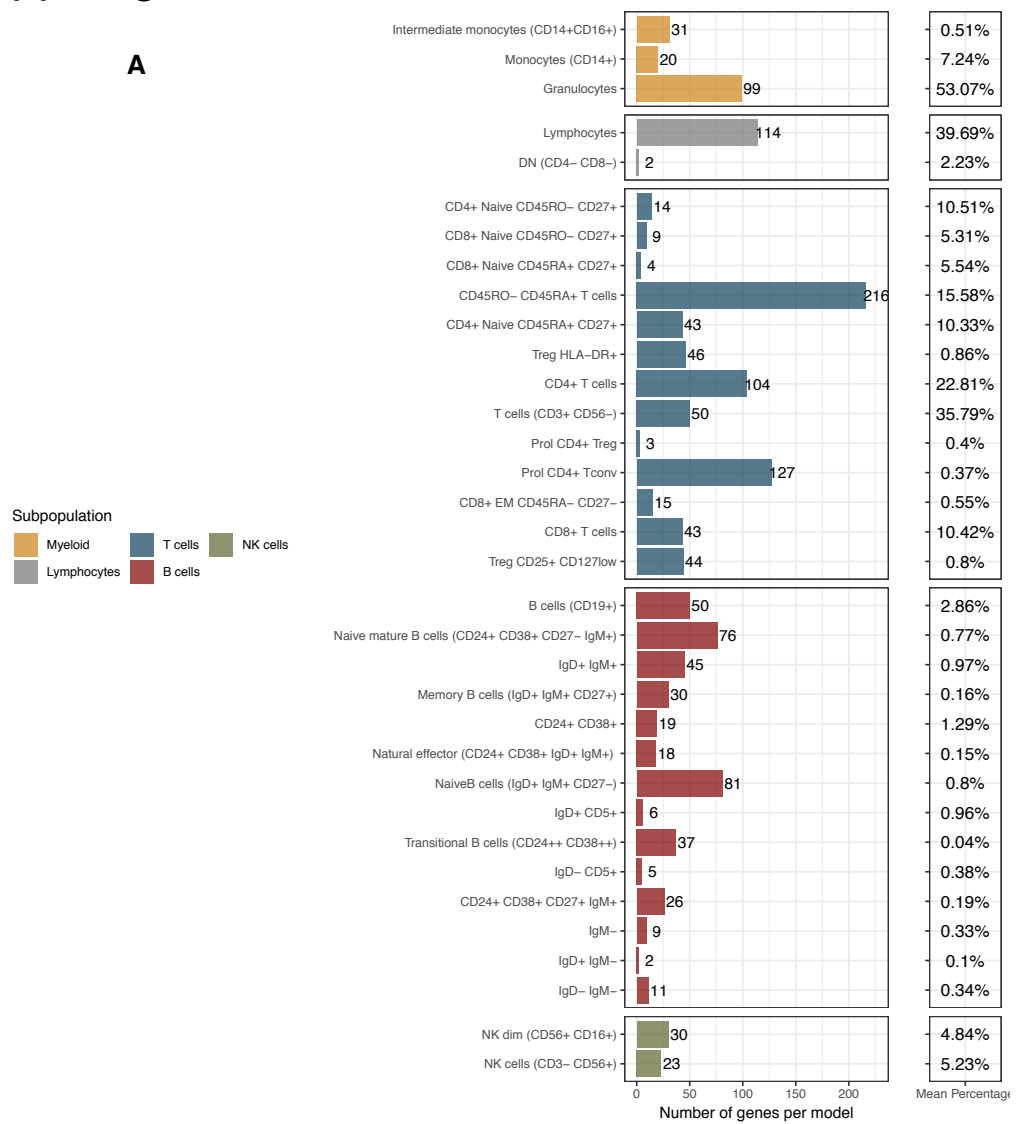

**B**

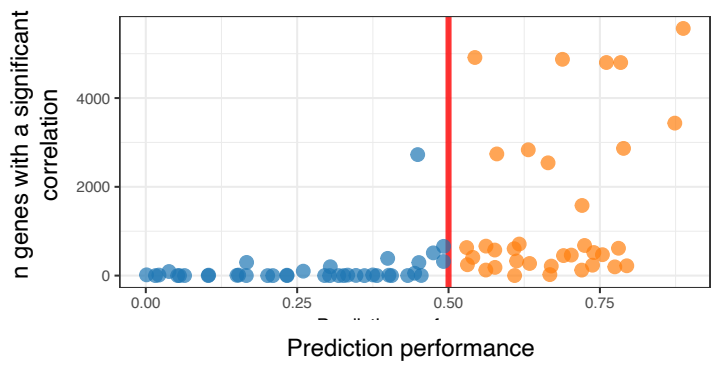

**C**

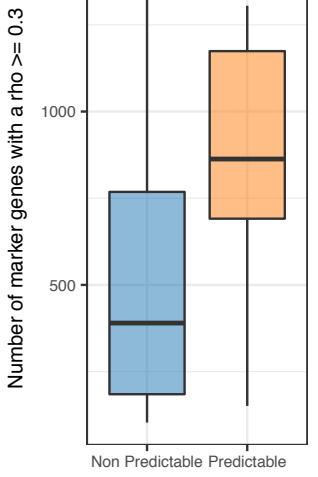

# Supp. Figure 3.

## A

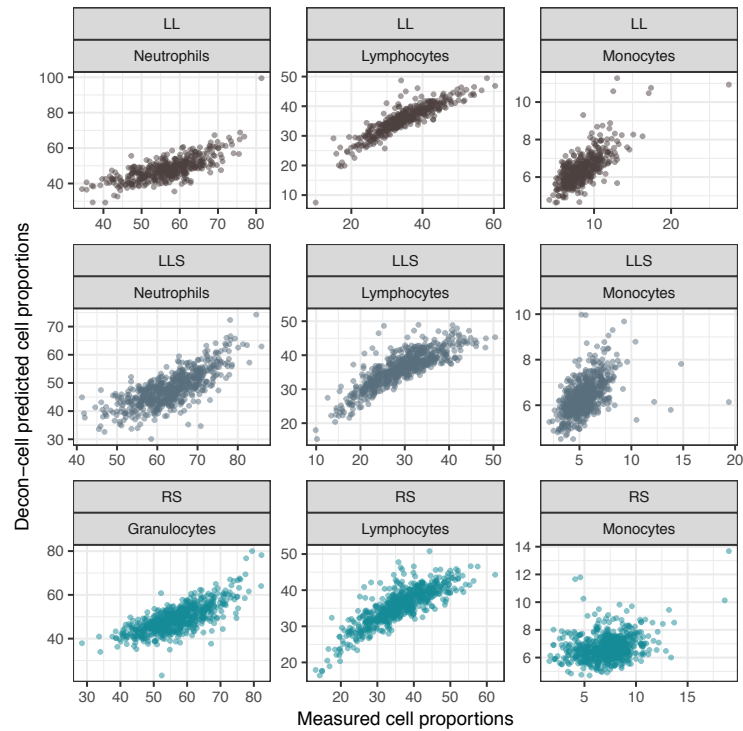

## B

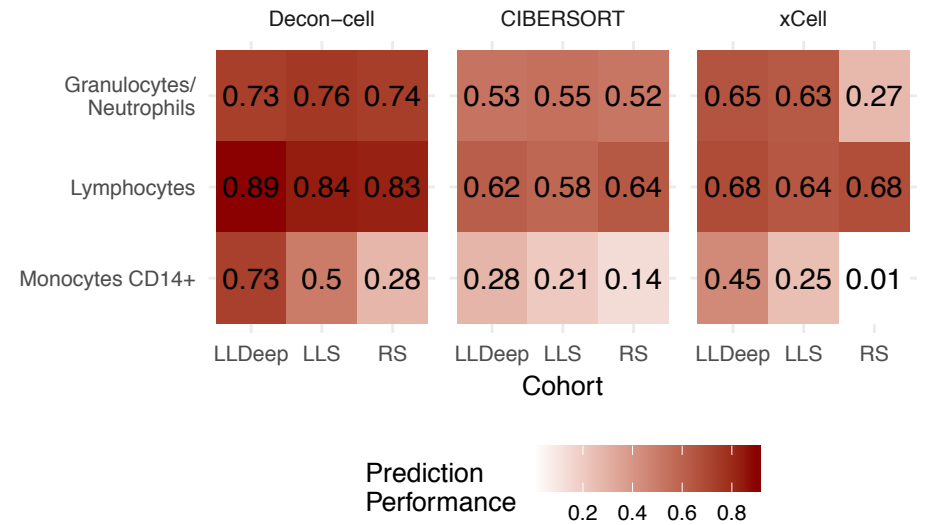

# Supp. Figure 4.

## A

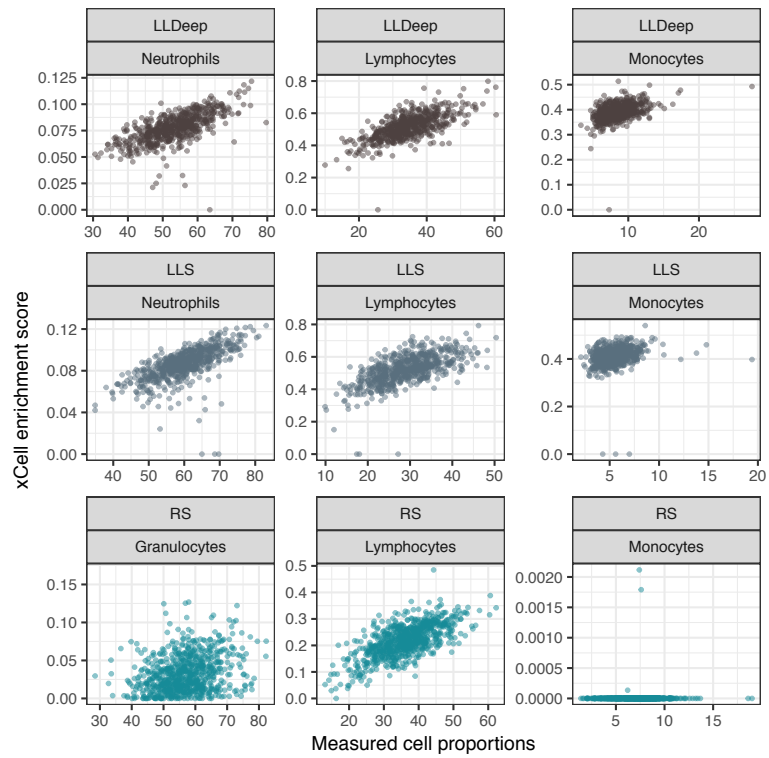

## B

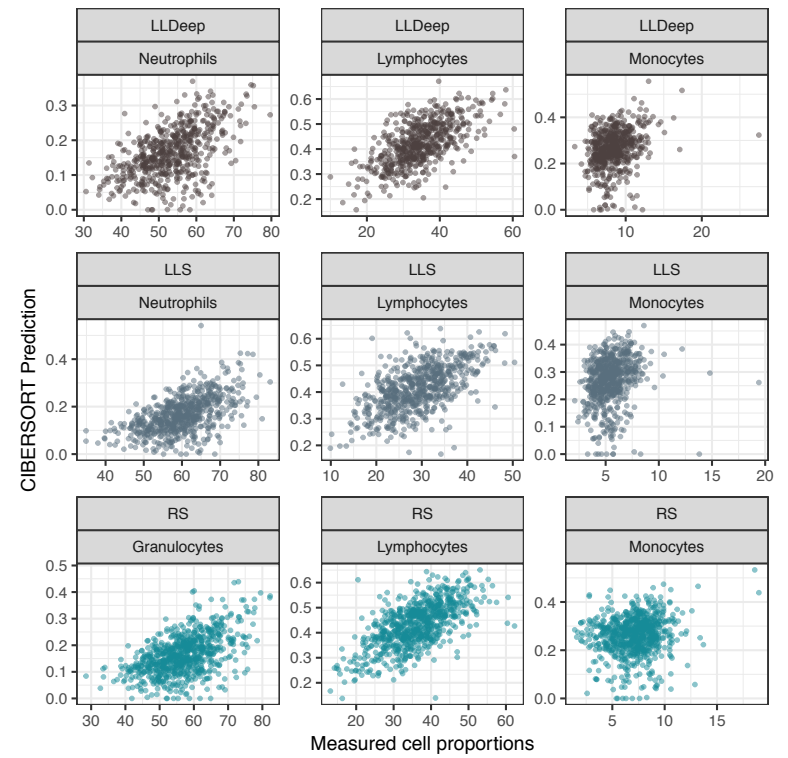

Supp. Figure 5.

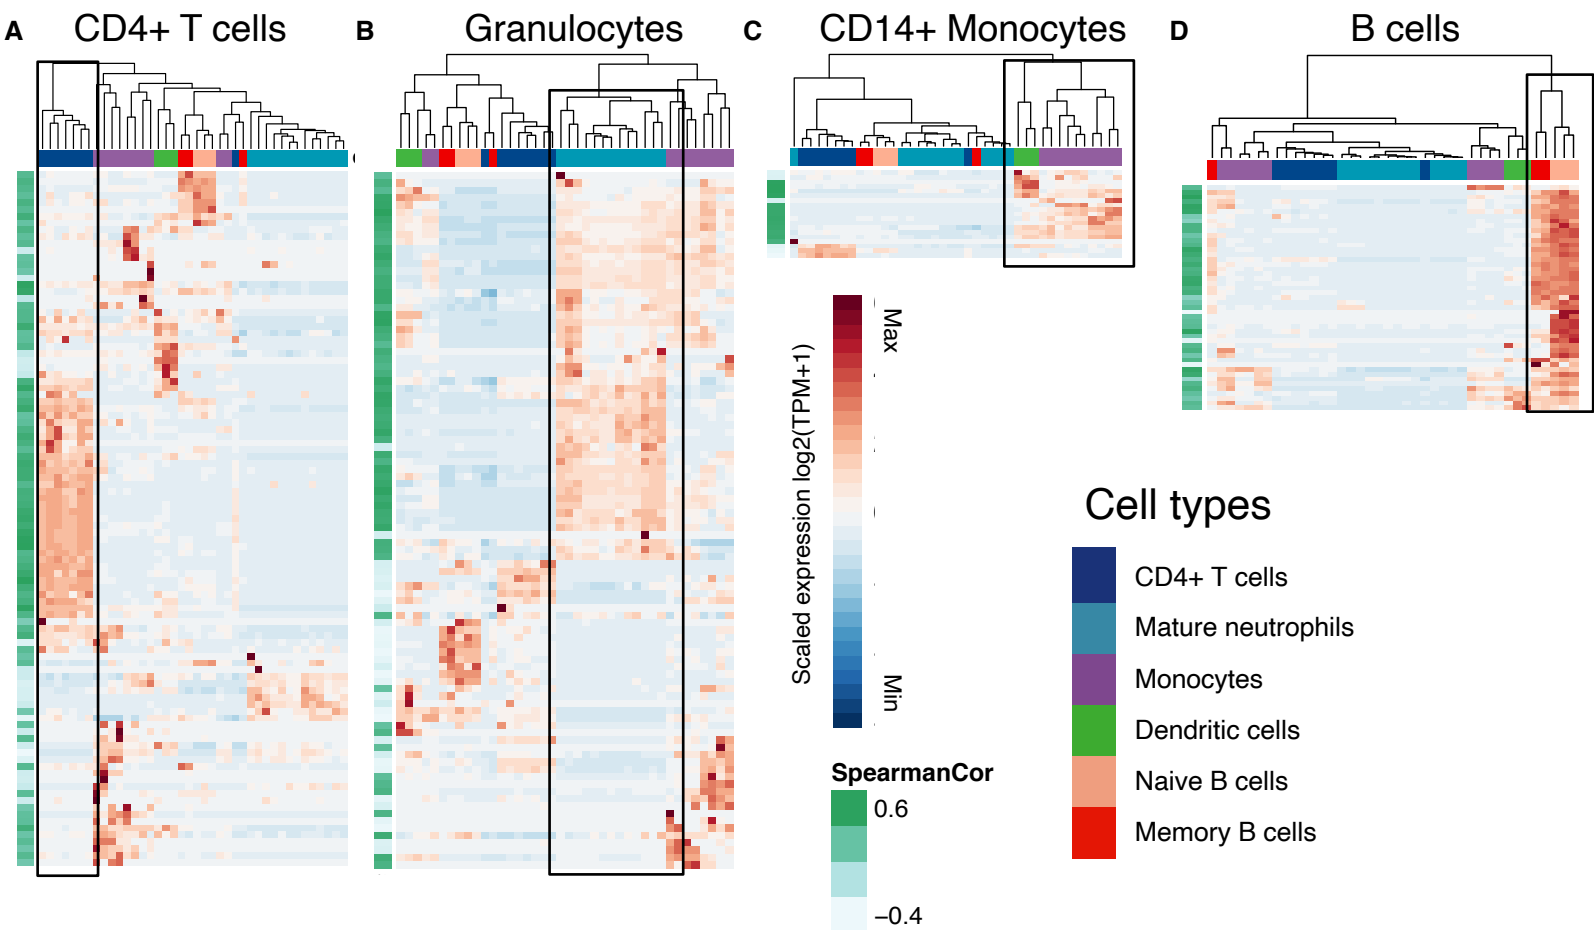



Supp.Figure 7

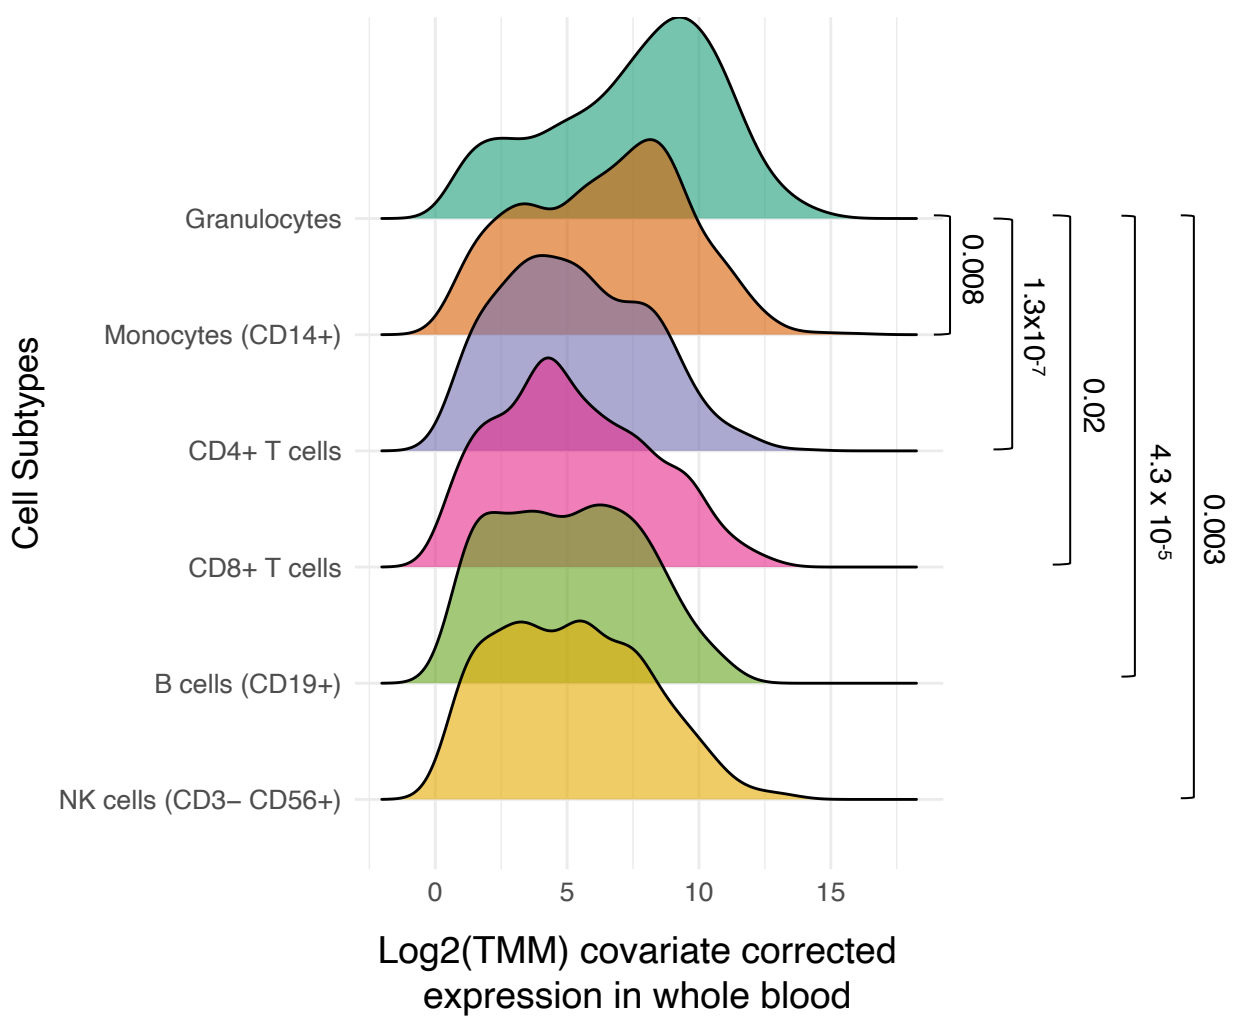

Supp. Figure 8

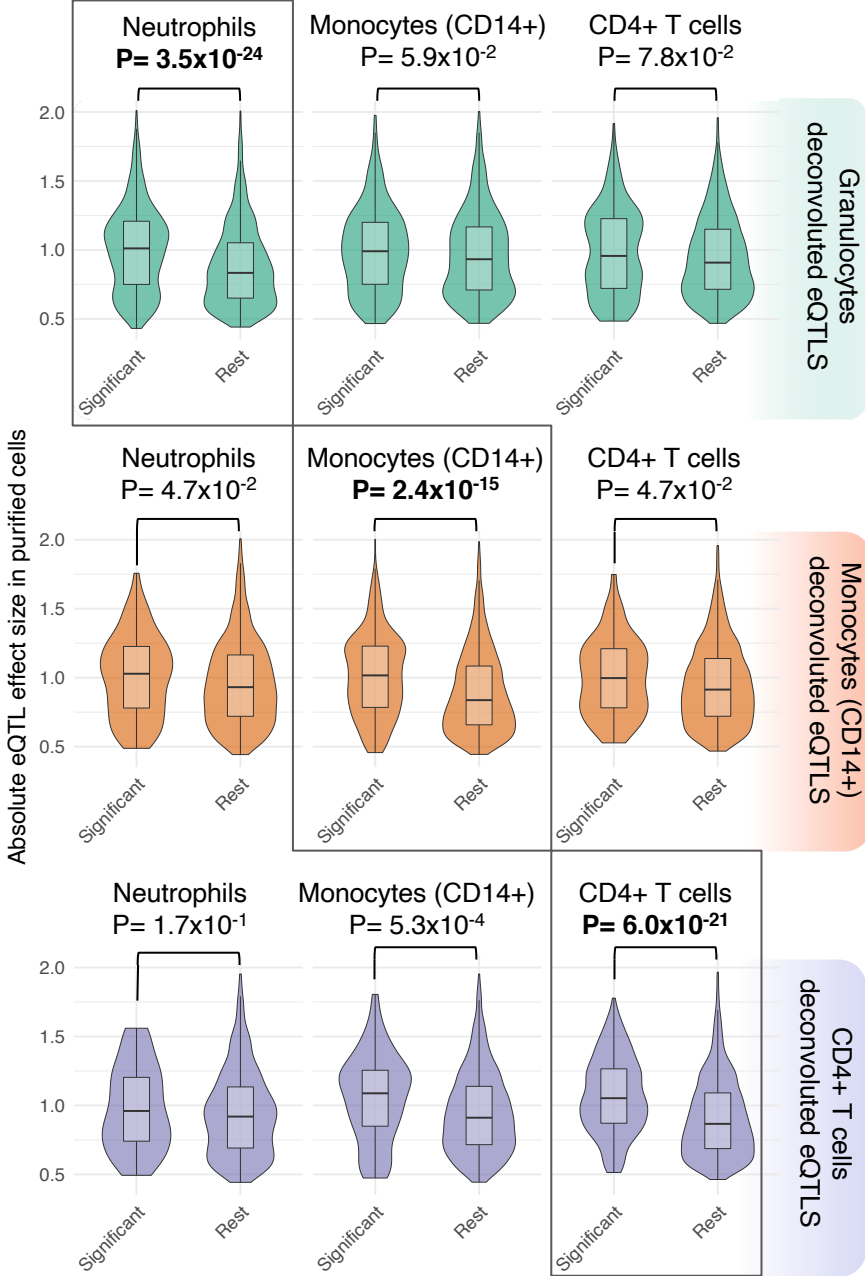



Supp. Figure 9

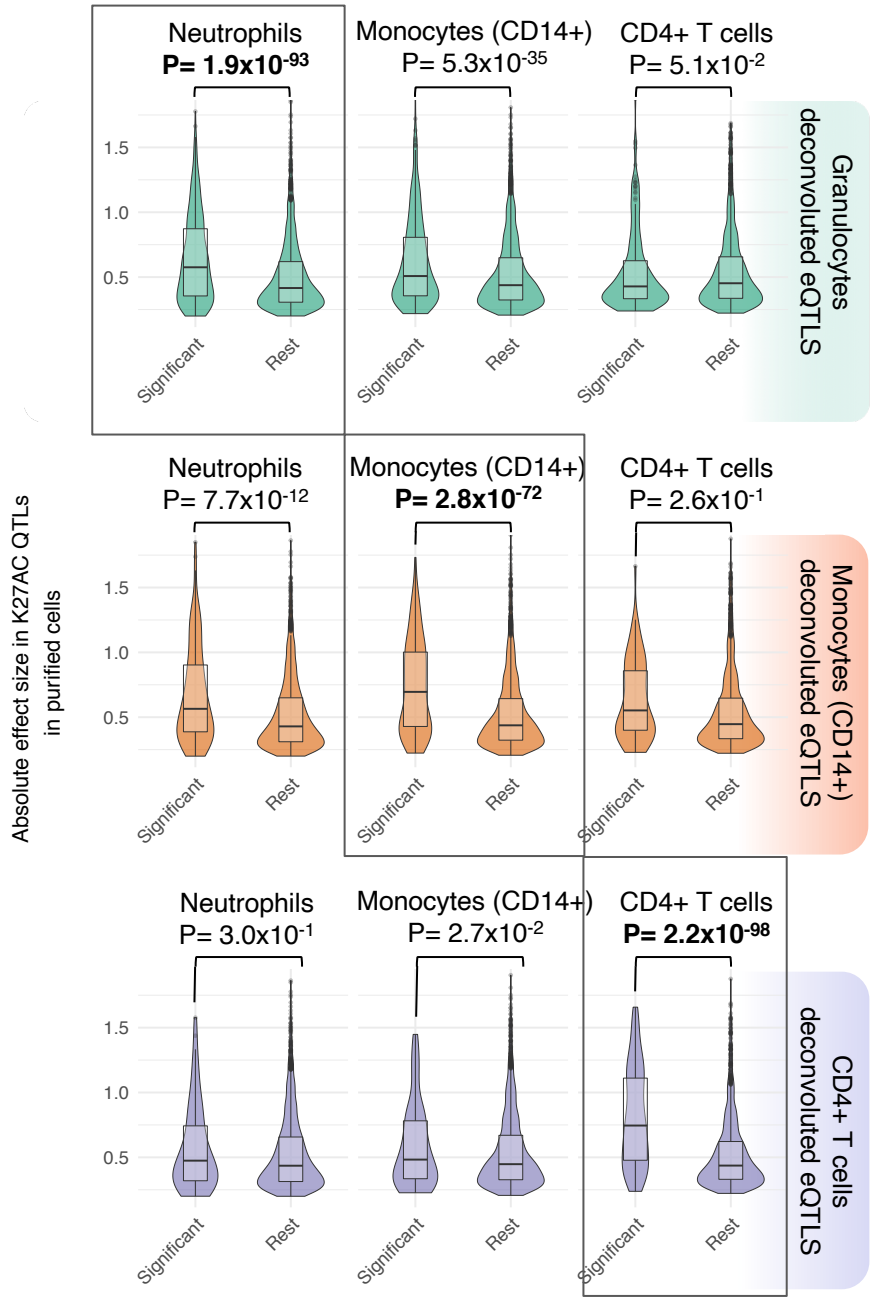

Supp. Figure 10

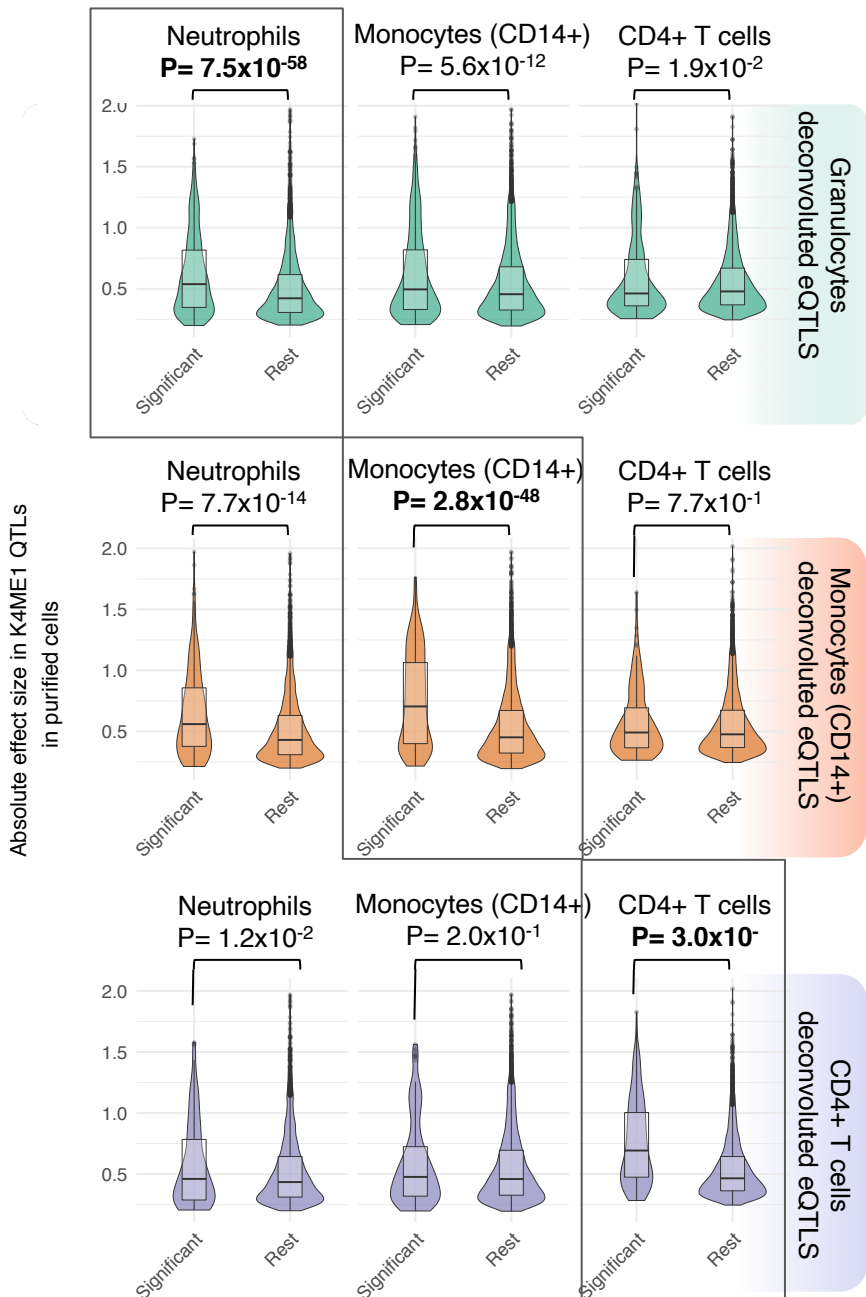

# Supp. Figure 11

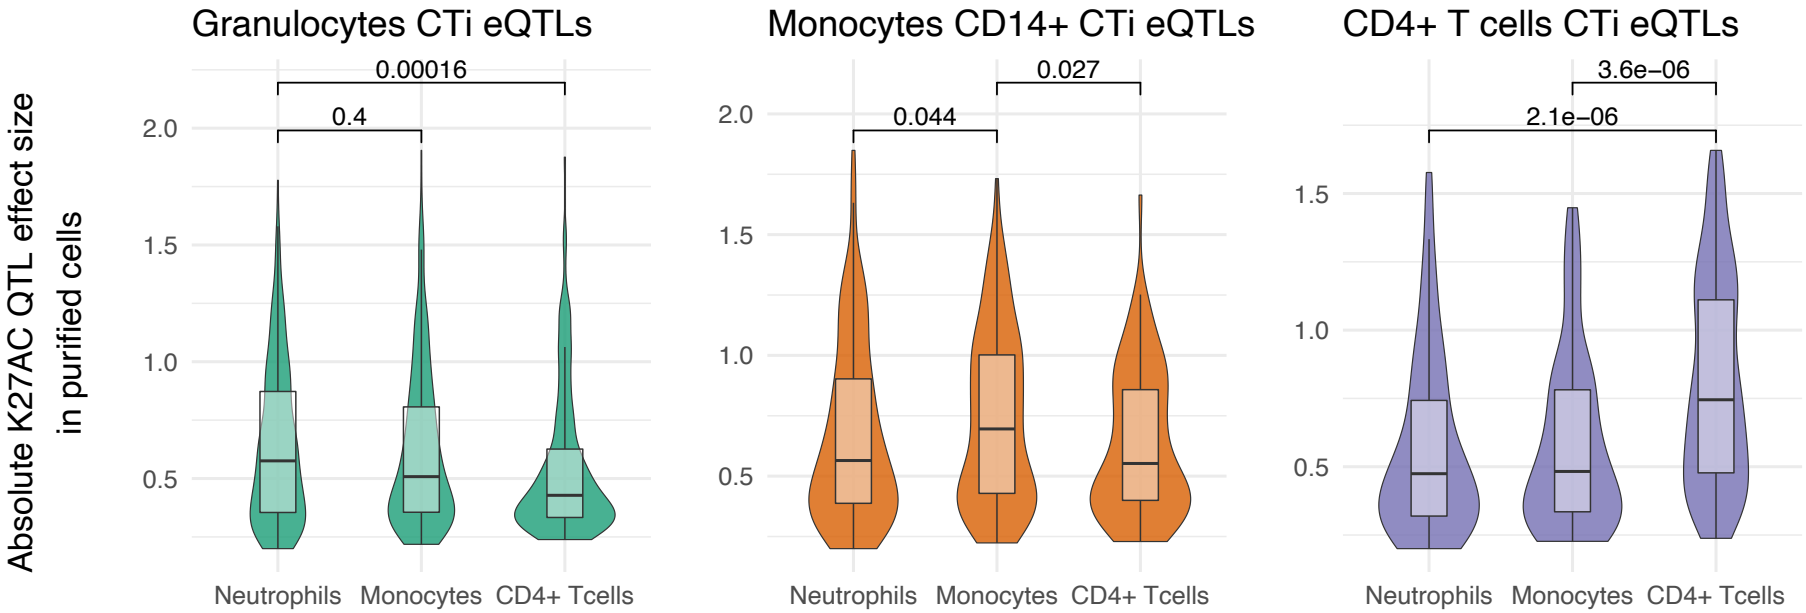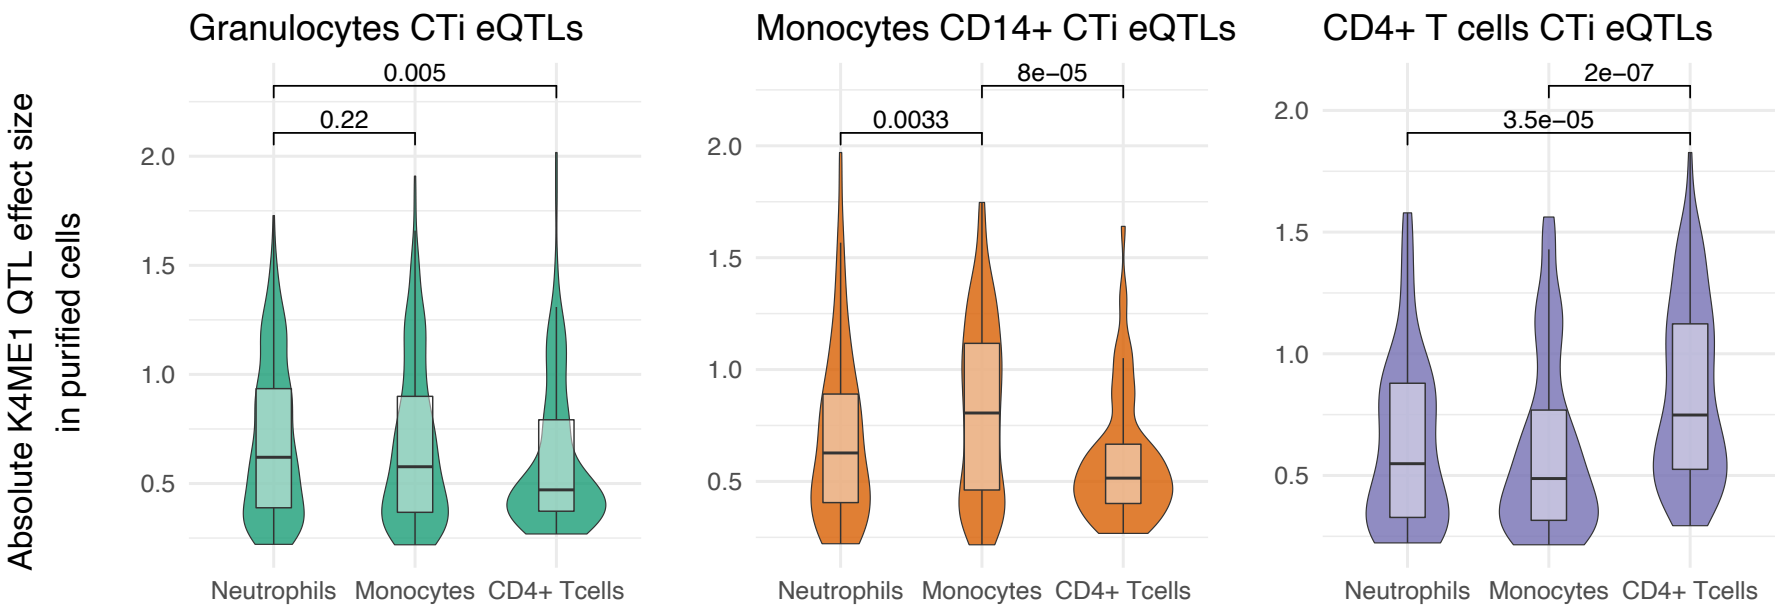

# Supp. Figure 12

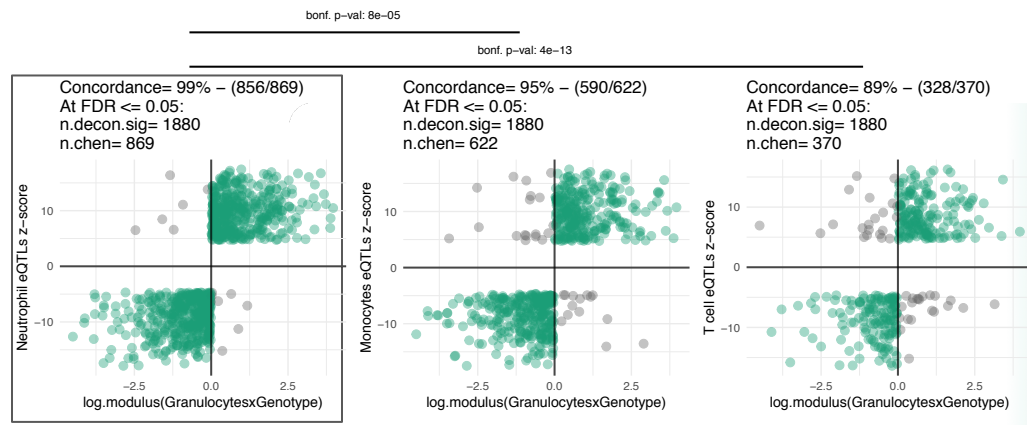

Granulocytes deconvoluted eQTLs

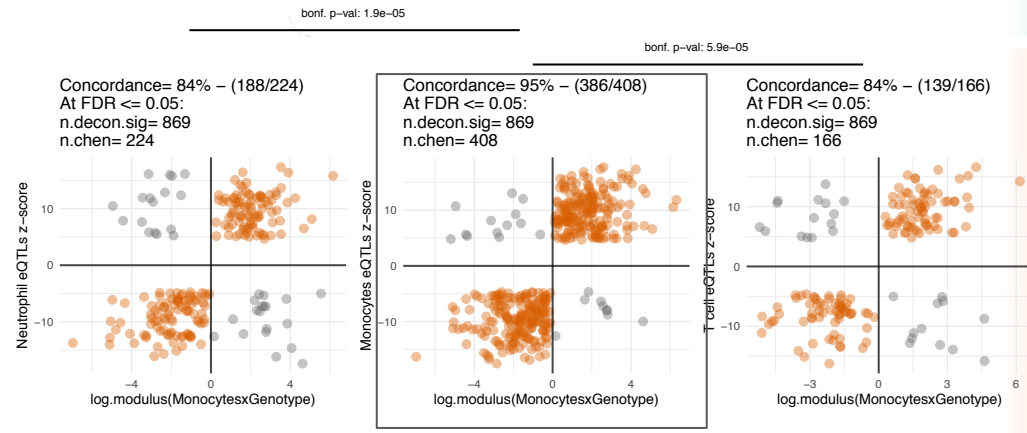

Monocytes (CD14+) deconvoluted eQTLs

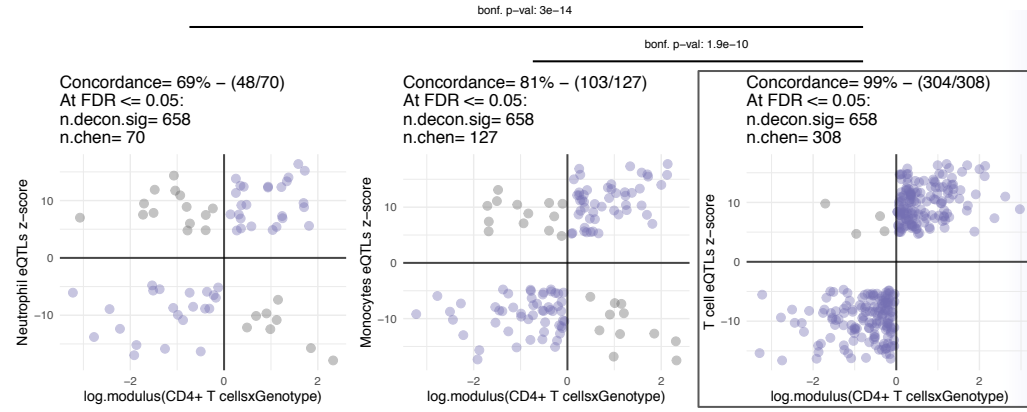

CD4+ T cells deconvoluted eQTLs

# Supp. Figure 13

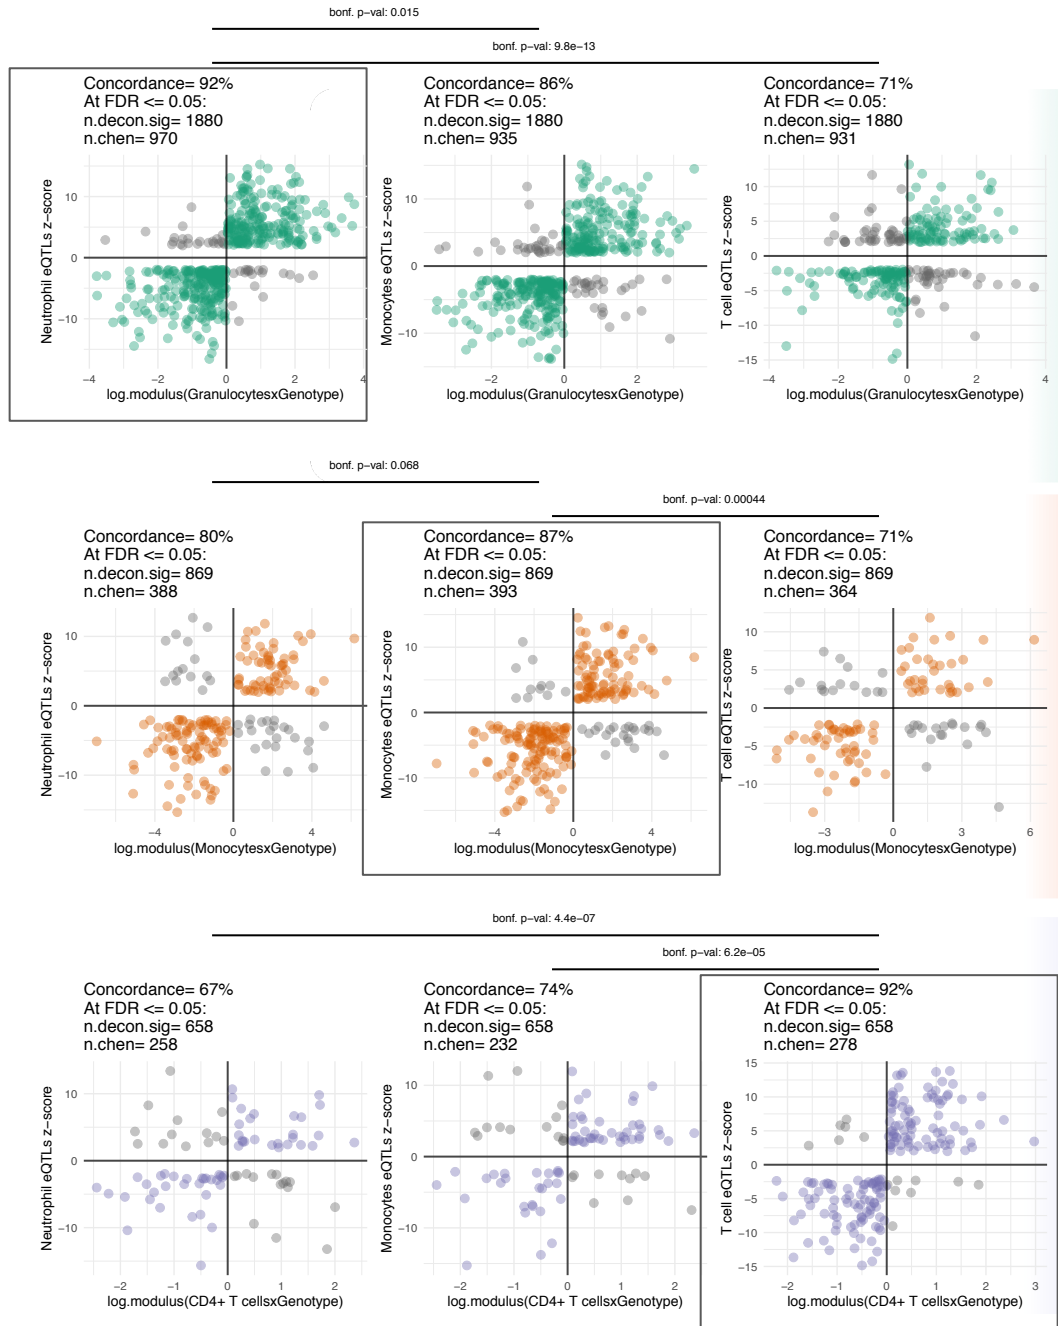

Granulocytes  
deconvoluted eQTLs

Monocytes (CD14+)  
deconvoluted eQTLs

CD4+ T cells  
deconvoluted eQTLs

# Supp. Figure 14

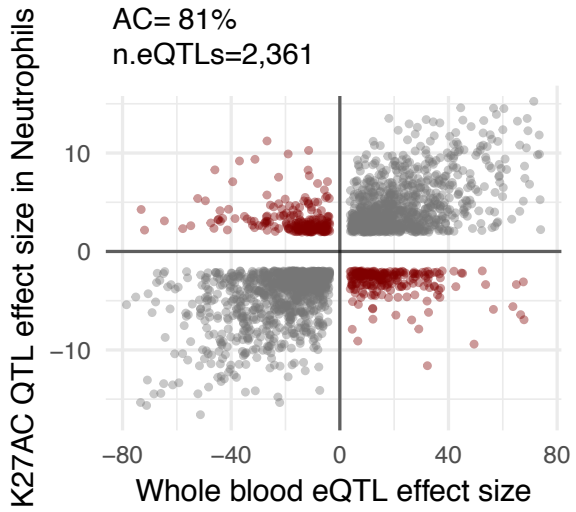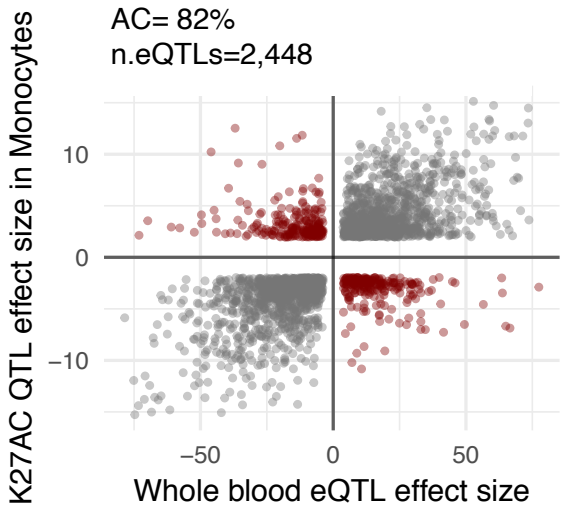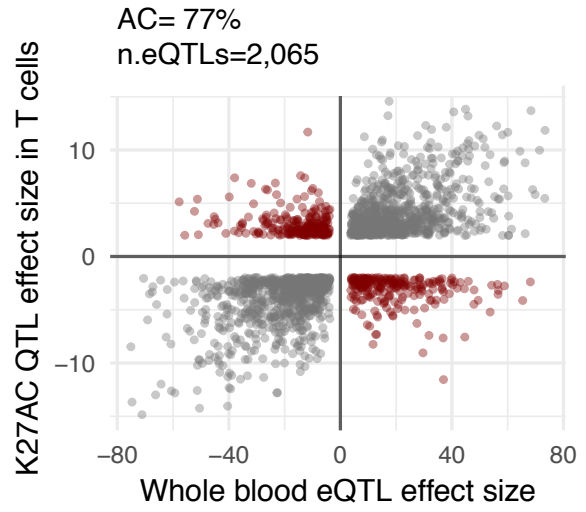

Supp. Figure 15

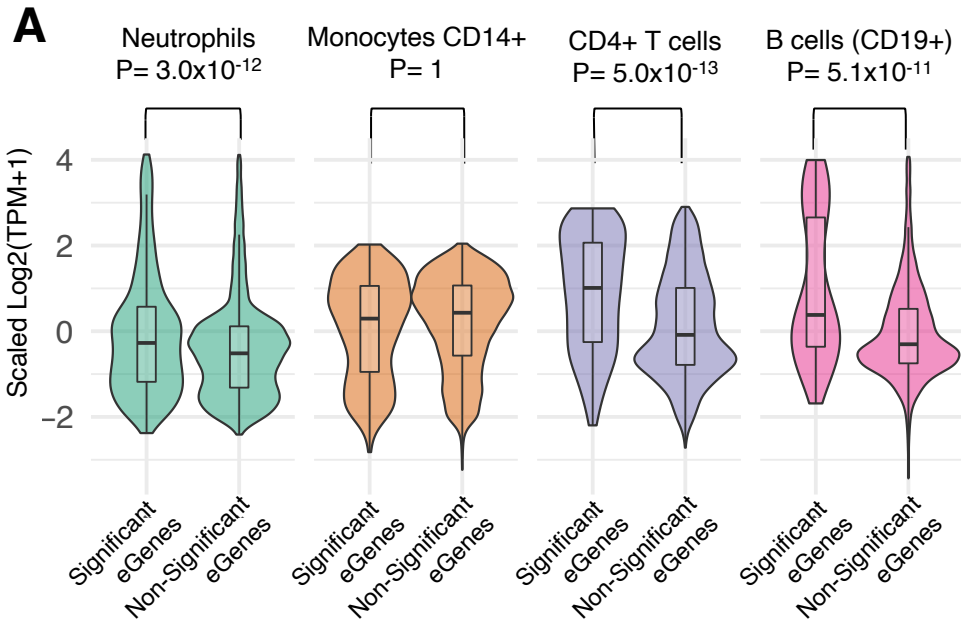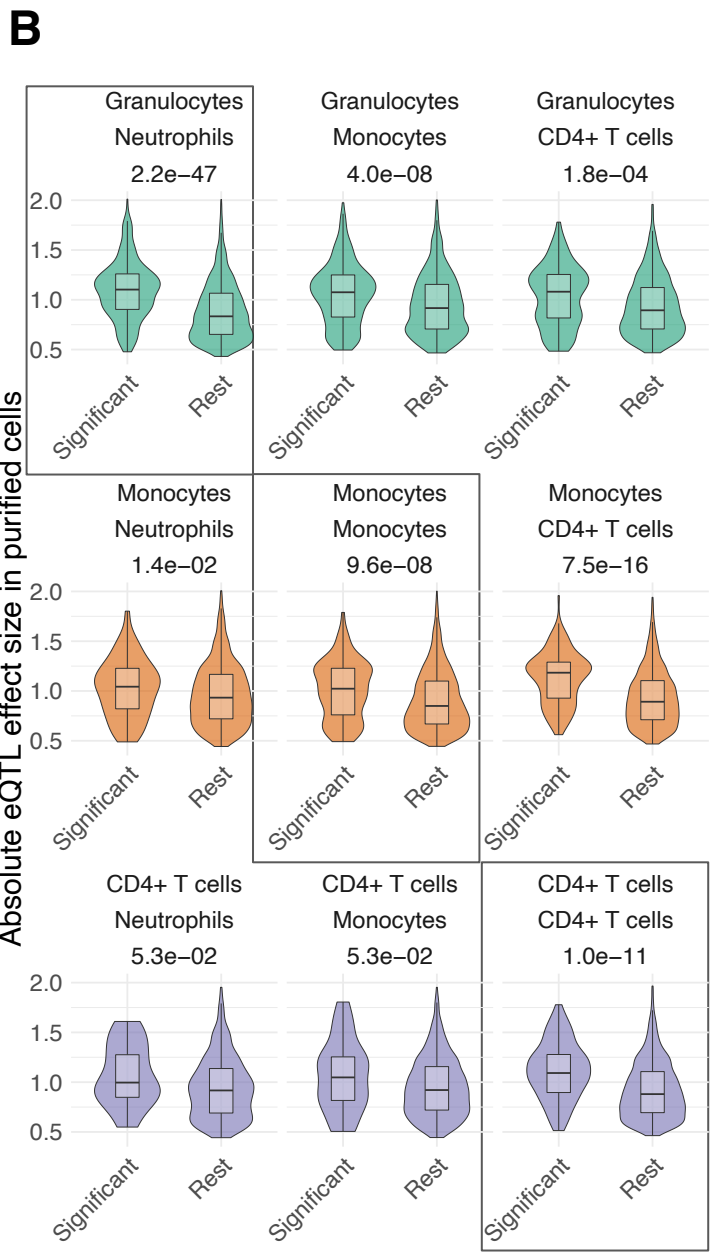

# Supp. Figure 16

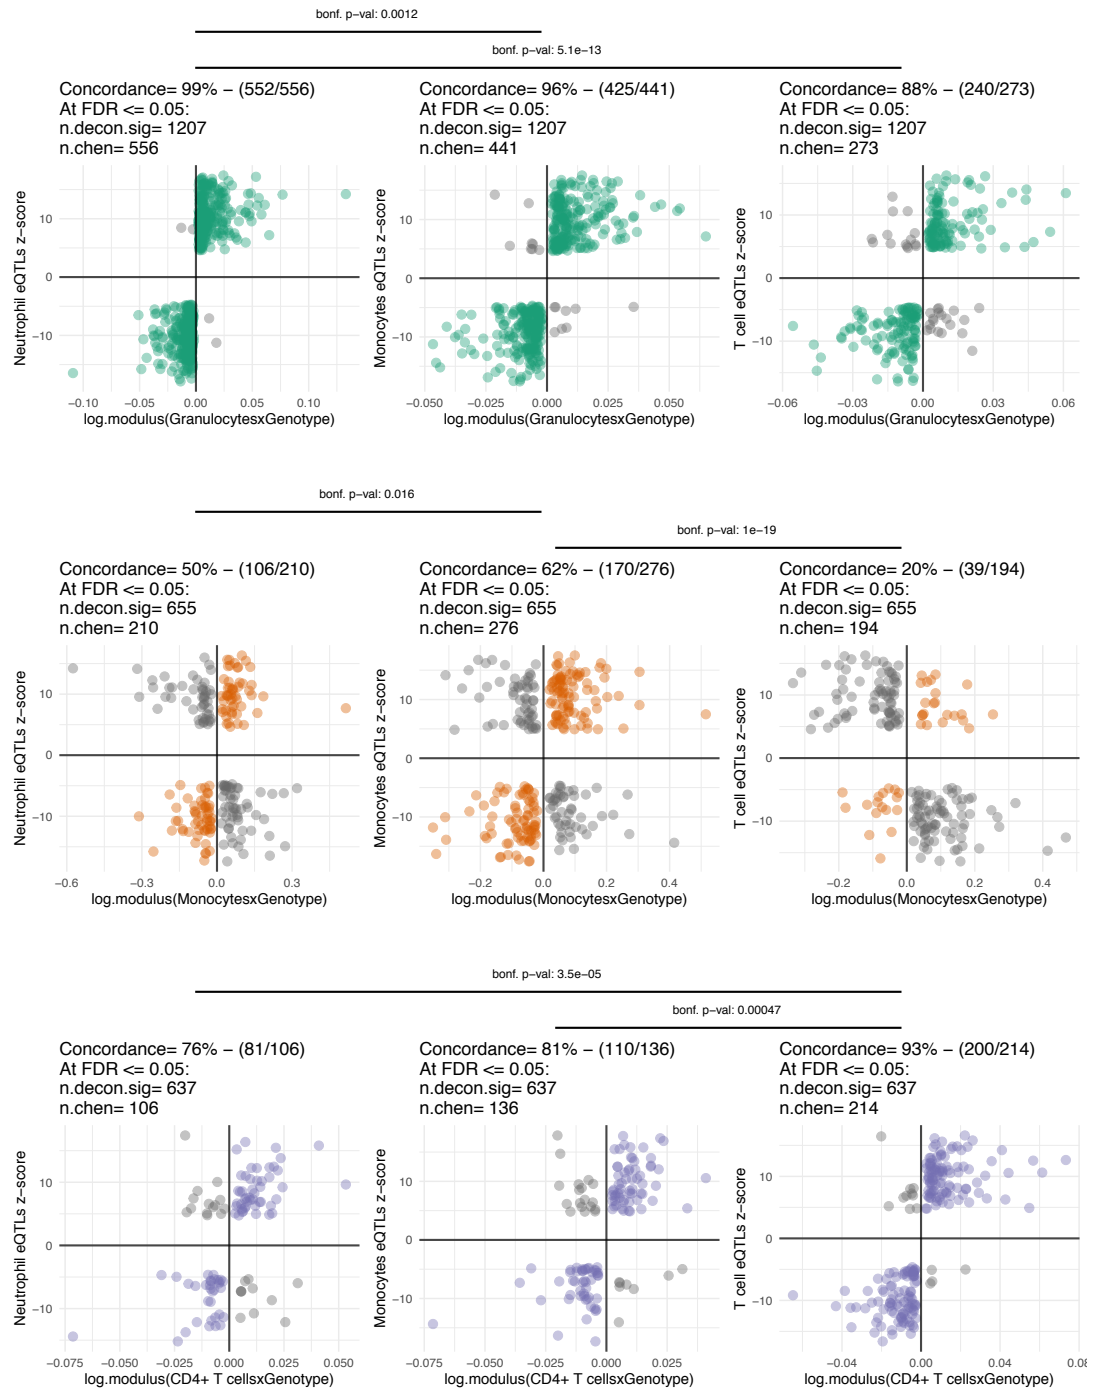



Supp. Figure 17

**A**

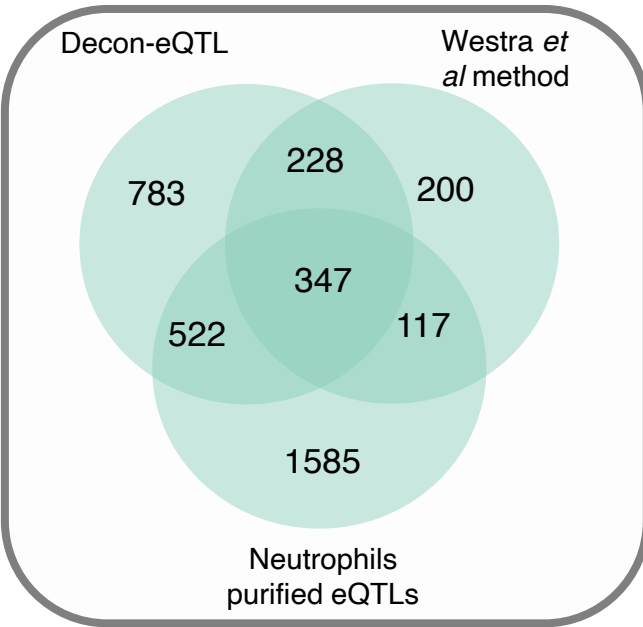

**B**

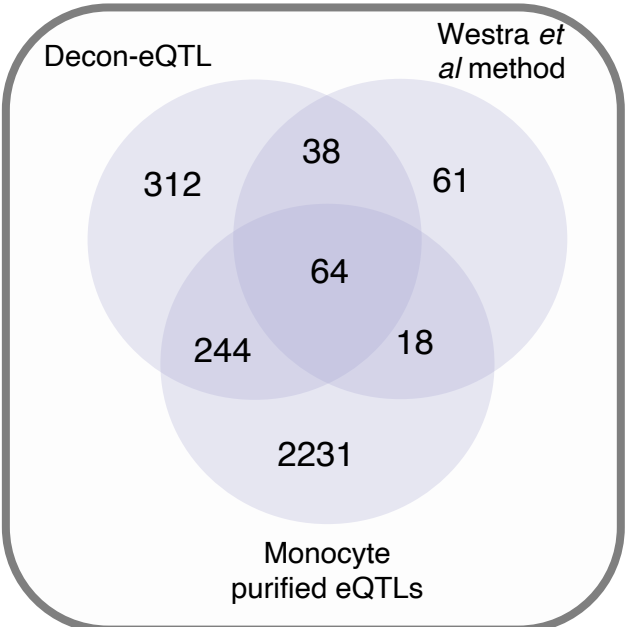

**C**

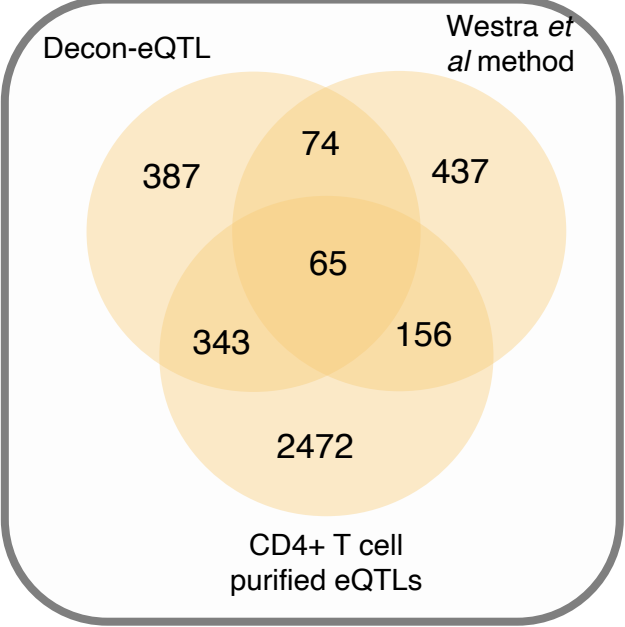

15,616 BIOS whole blood cis-eQTL top effects



# Supp. Figure 19

**A**

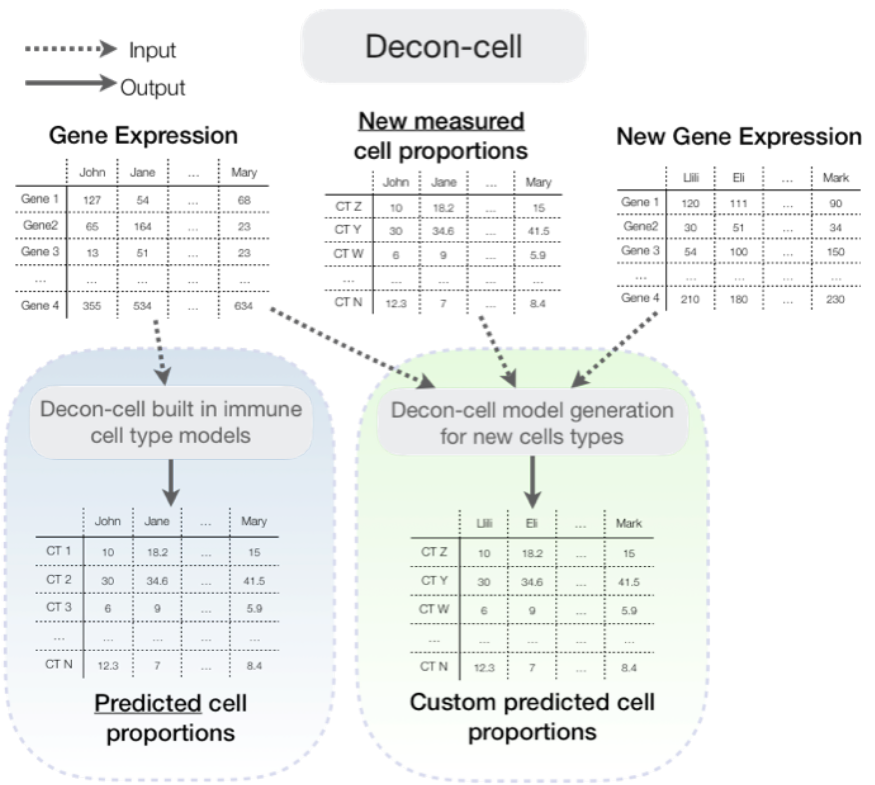

**B**

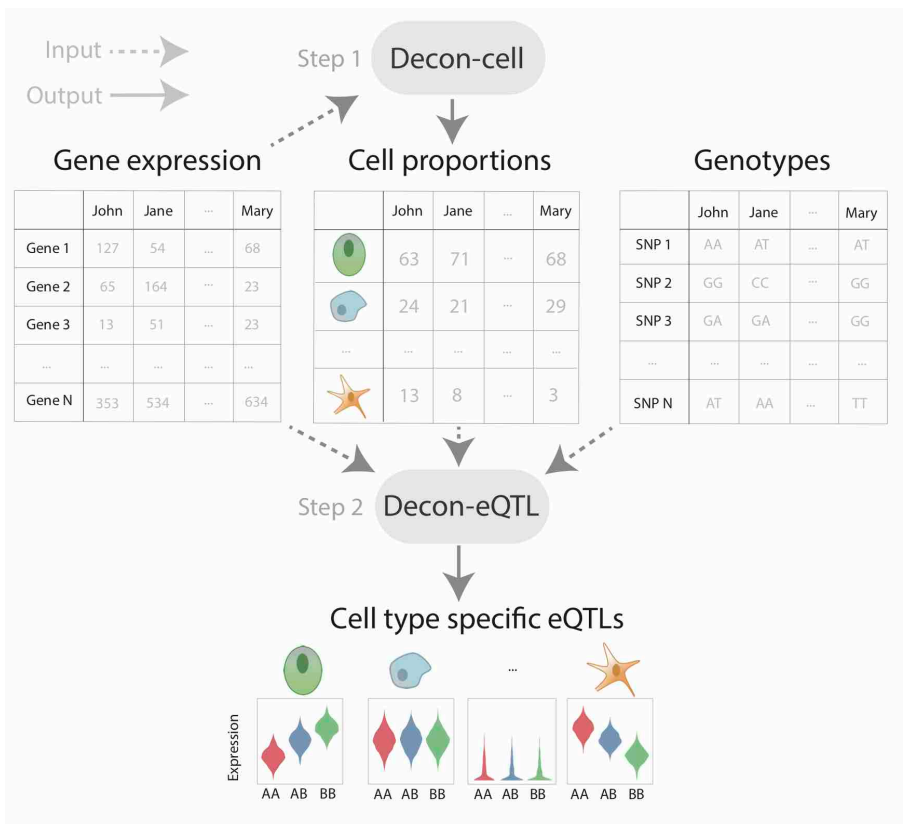

Supplement: 12859_2020_3576_MOESM1_ESM.pdf [file 12859_2020_3576_MOESM1_ESM.pdf]
